# Supplementary material for: The Vessels-Bone Axis: Iliac Artery Calcifications, Vertebral Fractures and Vitamin K from VIKI Study
Source: MDPI journal article supplement (doi:10.3390/nu13103567), 2021-10-12
Supplement: s1 [file s1]

**Supplementary Table S1:** Vitamin K Status by presence of iliac artery calcifications

| Vitamins          | Iliac Calcification<br>(Yes) | Iliac Calcification<br>(No) | P-value          |
|-------------------|------------------------------|-----------------------------|------------------|
|                   | N=217, 56.1%                 | N=170, 43.9%                |                  |
| K1, ng/mL         | 0.62 (0.31, 1.06)            | 0.64 (0.35, 1.07)           | 0,695            |
| K1/triglycerides, | 0.40 (0.22, 0.70)            | 0.51 (0.23, 0.82)           | 0,116            |
| MK4 ng/mL         | 0.56 (0.18, 0.67)            | 0.49 (0.25, 0.67)           | 0,526            |
| MK4/triglycerides | 0.35 (0.12, 0.51)            | 0.41 (0.15, 0.51)           | 0,19             |
| MK7 ng/mL         | 0.99 (0.44, 1.15)            | 1.15 (0.56, 1.63)           | <b>0,003</b>     |
| MK7/triglycerides | 0.57 (0.26, 0.87)            | 0.87 (0.38, 1.26)           | <b>&lt;0.001</b> |

Data are given as median and interquartile range. Abbreviations: K1, vitamin K1; MK, menaquinone.

**Supplementary Table S2.** Therapy by the presence of iliac artery calcifications

| Drugs prescribed                      | Iliac Artery<br>Calcifications (Yes)<br>N=217, 56.1% | Iliac Artery<br>Calcifications (No)<br>N=170, 43.9% | P-value      |
|---------------------------------------|------------------------------------------------------|-----------------------------------------------------|--------------|
| Warfarin (n, %)                       | 37 (17.1%)                                           | 9 (5.3%)                                            | <b>0.001</b> |
| Steroids (n, %)                       | 12 (5.5%)                                            | 9 (5.3%)                                            | 0.919        |
| Thyroid hormones (n, %)               | 22 (10.1%)                                           | 18 (10.6%)                                          | 0.885        |
| Antibiotics (n, %)                    | 10 (4.6%)                                            | 6 (3.5%)                                            | 0.597        |
| Anti-epileptic drugs (n, %)           | 10 (4.6 %)                                           | 4 (2.4 %)                                           | 0.238        |
| Statins (n, %)                        | 72 (33.2%)                                           | 54 (31.8%)                                          | 0.768        |
| Beta-blockers (n, %)                  | 80 (36.9%)                                           | 64 (37.6%)                                          | 0.875        |
| Non-insulin glucose-lowering<br>drugs | 3 (1.4%)                                             | 4 (2.4 %)                                           | 0.477        |
| Insulin (n, %)                        | 37 (17.1 %)                                          | 21 (12.4 %)                                         | 0.199        |
| PPI (n, %)                            | 173 (79.7%)                                          | 120 (70.6%)                                         | <b>0.038</b> |
| Aluminium (n, %)                      | 57 (26.3%)                                           | 39 (22.9%)                                          | 0.452        |
| Calcium Carbonate (n, %)              | 78 (35.9%)                                           | 54 (31.8%)                                          | 0.389        |
| Calcium Acetate (n, %)                | 10 (4.6 %)                                           | 11 (6.5 %)                                          | 0.422        |
| Sevelamer (n, %)                      | 90 (41.5%)                                           | 73 (42.9%)                                          | 0.772        |
| Lanthanum (n, %)                      | 26 (12.0 %)                                          | 30 (17.6 %)                                         | 0.116        |
| Intravenous calcitriol (n, %)         | 8 (3.7 %)                                            | 4 (2.4 %)                                           | 0.453        |
| Oral calcitriol (n, %)                | 92 (42.4 %)                                          | 85 (50.0 %)                                         | 0.136        |
| Vitamin D analogs (n, %)              | 46 (21.2 %)                                          | 31 (18.2 %)                                         | 0.469        |
| Calcimimetics (n, %)                  | 37 (17.1 %)                                          | 38 (22.4 %)                                         | 0.19         |

Abbreviations: PPI, proton pump inhibitors.
